# Supplementary material for: Hydrogel hybrid porcine pericardium for the fabrication of a pre-mounted TAVI valve with improved biocompatibility
Source: Royal Society of Chemistry journal article supplement (doi:10.1039/c8tb02565g), 2019-01-01
Supplement: c8tb02565g1.pdf [file c8tb02565g1.pdf]

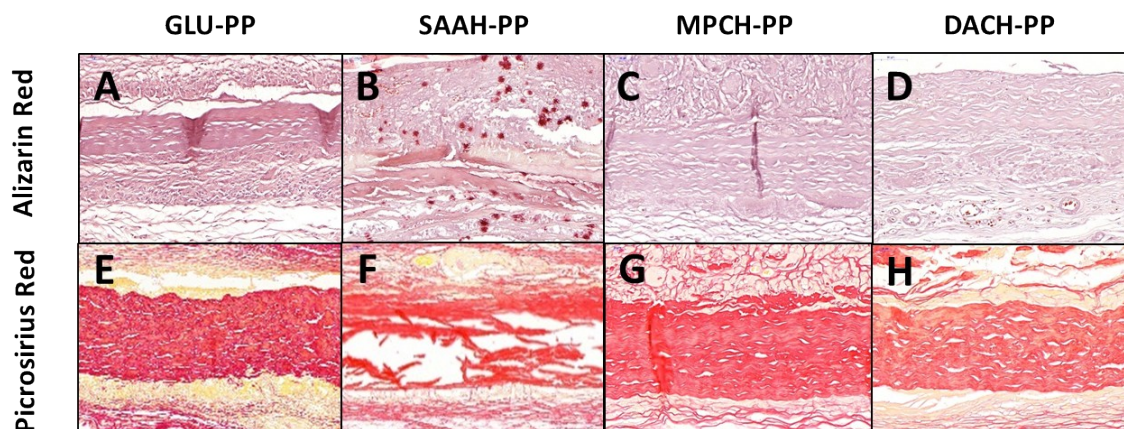

Fig. S1. Histological characterization of GLU-PP, SAAH-PP, MPCH-PP and DACH-PP samples after subcutaneous implantation for 21 days in SD rats. (A-D) Alizarin red staining. Ca deposition was stained deep red. (E-H) Picrosirius red staining. Collagen fibers were stained red to show the structure integrity.

**Supplemental Video Legends:**

**Supplemental Video 1.** Video of GLU-PP sample recovering in PBS after being folded for 10 days.

**Supplemental Video 2.** Video of SAAH-PP sample recovering in PBS after being folded for 10 days.

**Supplemental Video 3.** Video of MPCH-PP sample recovering in PBS after being folded for 10 days.

**Supplemental Video 4.** Video of DACH-PP sample recovering in PBS after being folded for 10 days.
